# Supplementary material
Source: ML conference proceedings conference paper supplement (https://openaccess.thecvf.com/content/CVPR2025/html/He_VISTA3D_A_Unified_CVPR_2025_paper.html)
Supplement: Supplementary file 2 [file He_VISTA3D_A_Unified_CVPR_2025_supplemental.zip]

# VISTA3D: A Unified Segmentation Foundation Model For 3D Medical Imaging

## —Supplementary Material—

### Supplementary Material

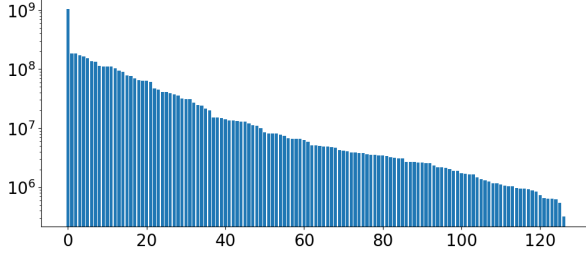

Figure 1. Distribution of annotated voxels in the training set (X-axis: class index, Y-axis: number of annotated voxels per class).

## 1. Dataset Details

Table 1 lists more details about our curated dataset. Fig. 1 shows the number of annotated voxels according to the corresponding task classes. Spatial resolutions range from  $0.45 \times 0.45 \times 0.45$  to  $1.50 \times 1.50 \times 7.50$  (median:  $0.88 \times 0.88 \times 1.50$ )  $mm^3$ .

**Global and local index for the partial label** Those datasets have different number of classes and indexes in their manual labels (e.g. Pancreas in MSD07 has index 1 but 10 in TotalSegmentatorV2). We curated a global index of 127 integers and mapped all local indexes in each individual dataset to this global index. We also curated a **label set** list for each dataset, containing the class index that will be used within this dataset. We included as much dataset with a commercial license as possible for the development of this method.

| Dataset ID                 | Type                                        | # cases used |
|----------------------------|---------------------------------------------|--------------|
| TCIA Pancreas CT [12]      | Abdominal CT organs                         | 80           |
| AbdomenCT-1K [9]           | Abdominal CT organs                         | 1,050        |
| AMOS22 [7]                 | Abdominal CT organs                         | 300          |
| MSD Task 3,6,7,8,9,10 [1]  | Various lesions                             | 945          |
| CT-ORG [11]                | Lung, bones, liver, kidneys, bladder        | 136          |
| TotalSegmentator [4]       | Many anatomic structures                    | 1,228        |
| CRML-CT [15]               | Liver, colorectal liver metastases          | 197          |
| VerSe [14]                 | Vertebral labelling                         | 374          |
| AeroPath [16]              | Airways and lungs                           | 27           |
| Bone lesion (in-house)     | bones                                       | 296          |
| LIDC-IDRI [2]              | Unannotated, lung cancer screening thoracic | 470          |
| COVID-19 [5]               | Unannotated, chest                          | 524          |
| TCIA Colonography [8]      | Unannotated, abdomen                        | 1,440        |
| StonyBrook COVID19 CT [13] | Unannotated, chest                          | 1,274        |
| NLST [17]                  | Unannotated, chest                          | 3,113        |

Table 1. Summary of datasets used for model training.

## 2. Computational Details

**Training Requirements** The model is trained on 64 32GB NVIDIA V100 GPUs with around 20,000 total GPU hours. The prompt number (object class) in a single training iteration is 36 for automatic branch, and 4 for point branch. The

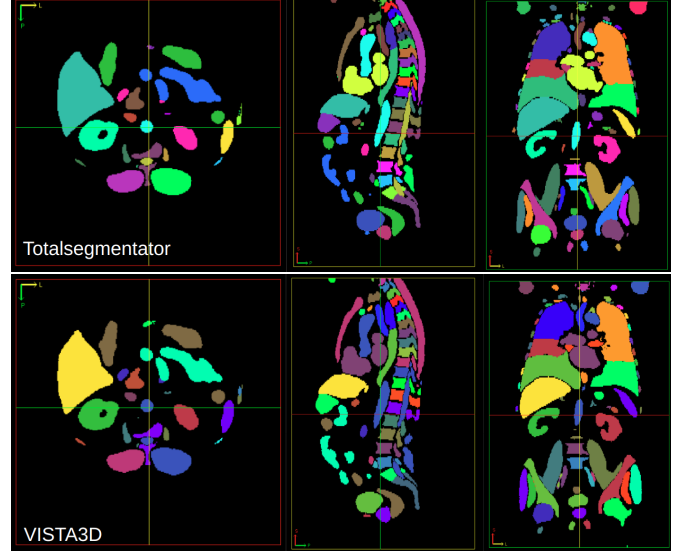

Figure 2. An example of whole class segmentation on a typical sized human CT scan. Running on a lower end machine with 12GB GPU. The runtime for VISTA3D is 1m43s and 2m41s for TotalSegmentator.

model can be trained with 16GB memory GPUs or even lower by reducing the prompt number in each iteration, at the cost of longer training time if number of classes is large.

**Inference Requirements** The inference GPU memory requirements also depend on the prompt number and image size. Since the model is based on sliding window of size  $128 \times 128 \times 128$ , the GPU memory requirements can be optimized to be stable and less dependent on image size. We used a sliding window inferer with adaptive memory control to switch between CPU and GPU to avoid the out-of-memory issue. We benchmarked the runtime on a 16GB V100 GPU in the main paper. TotalSegmentator uses 5 sub-task models for different class groups and thus can be slower. Here we also performed inference on a lower-end environment with 12GB memory GPU and 32GB memory CPU. The results of a typical CT scan (a MSD task03 test scan [1], size  $308 \times 260 \times 453$  after resampling) are shown in Fig. 2. The runtime for VISTA3D is 1m43s and 2m41s for the TotalSegmentator. For interactive segmentation, the single-click point inference run-time is 3.2s on the same 12GB GPU machine. Two examples are shown in Fig. 3.

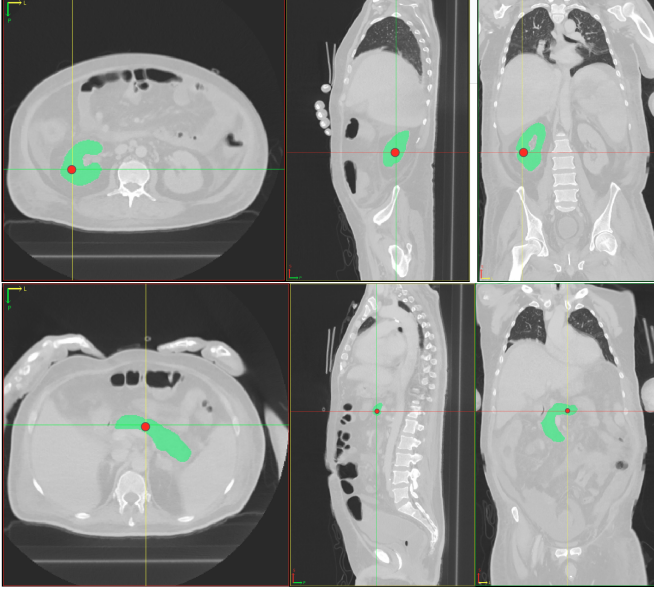

Figure 3. An example of using single point click for organ segmentation. Runtime on a machine with 12GB GPU and 32GB CPU is constant 3.2 seconds, regardless of image size or organ size.

### 3. Additional training details

#### 3.1. Stage1-Interactive branch training

The algorithm is shown in Alg. 1. The point sampler  $S$  works as a data augmenter, with 50% probability to sample points directly from  $y$  to get the point  $p$  and binary groundtruth mask  $y_{gt}$  as a training pair, while another 50% will be used with the following augmentations: a) random sample points from supervoxel and form a zero-shot training pair. b) random add or subtract a supervoxel mask that satisfies a certain size and position criterion to  $y$ , this is used to force the model to be able to edit supported class mask. Meanwhile, when the subtraction or addition size exceeds a certain limit, the generated training pair will also be used as zero-shot pairs with the zero-shot embedding. We use  $max_{iter} = 5$  for the training.

#### 3.2. Stage3-Automatic branch training

For each patch, we randomly sample the existing class indexes  $c$  from its manual label or pseudo-label and obtain the corresponding binary mask  $y_{gt}$  or  $y_{gt}^p$ . The algorithm is shown in Alg. 2. Unlike traditional segmentation models that do softmax on multichannel output, our automatic segmentation is based on promptable binary segmentation, thus prone to produce false positives. We mitigate this issue by sampling the background prompts from  $label\_set - y.unique()$  or  $label\_set - y^p.unique()$  and train the model to produce zero output when responding to the prompt. So in each iteration, a 128 cubic image patch is

#### Algorithm 1 Interactive branch training

**Require:** VISTA interactive branch model  $\Phi$ , image patch  $x$ , image manual label  $y$ , image pseudo label  $y_p$ , supervoxel  $y_s$ .

**Ensure:** At least one of  $y$  or  $y_p$  are not None

```

 $S \leftarrow point\_sampler(y, y_s)$   $\triangleright$  Initialize point sampler based on manual label and supervoxel
 $S_p \leftarrow point\_sampler(y_p, y_s)$ 
 $p, y_{gt} \leftarrow S.sample()$   $\triangleright$  Sample point prompts  $p$  and segmentation mask  $y_{gt}$ 
 $p^p, y_{gt}^p \leftarrow S.sample()$ 
for  $i = 1$  to  $max\_iter$  do
     $loss \leftarrow LossFunction(\Phi(x, p), y_{gt})$ 
     $loss_p \leftarrow LossFunction(\Phi(x, p^p), y_{gt}^p)$ 
    update  $\Phi$  using  $loss + loss_p$ 
     $p = p \cup Sample(\Phi(x, p), y_{gt})$   $\triangleright$  Sample 1 point each from false positive and negative region
     $p^p = p^p \cup Sample(\Phi(x, p^p), y_{gt}^p)$ 
end for

```

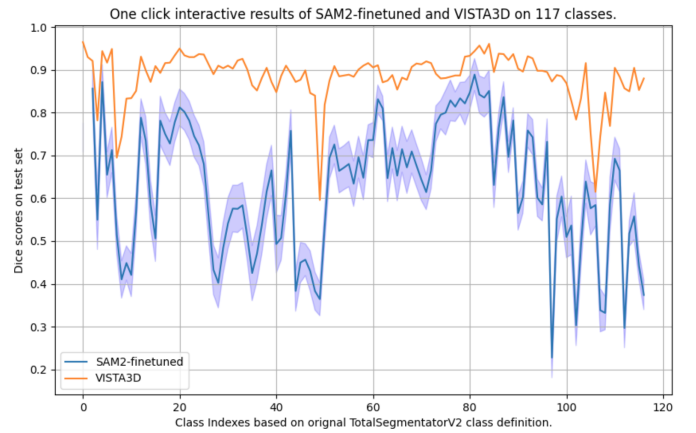

Figure 4. One-point interactive results for SAM2 and VISTA3D on TotalSegmentatorV2 test split. SAM2 is finetuned on the training split with SAM2’s official finetuning script. Click point selected at the center slice of each foreground.

the model input, and we sample a maximum of 32 class prompts using Alg. 2 and a maximum of four background prompts. All of those prompts are concatenated in the batch dimension.

#### 3.3. SAM2 finetuning experiments

We performed a detailed fine-tuning experiment to see if the SAM2 object tracking-based algorithm can be applied to 3D medical image segmentation. We used the official SAM2 finetuning code<sup>1</sup> and finetuned on the TotalSegmentator [4] training set. Each axial slice is considered a video

<sup>1</sup><https://github.com/facebookresearch/sam2/tree/main/training>

| MSD Task07     | Pancreas | Pancreas Tumor |
|----------------|----------|----------------|
| VISTA3D        | 0.802    | 0.603          |
| SAM2-Finetuned | 0.557    | 0.308          |

Table 2. Single click performance on MSD Task07 test set. SAM2 finetuned only on the training split.

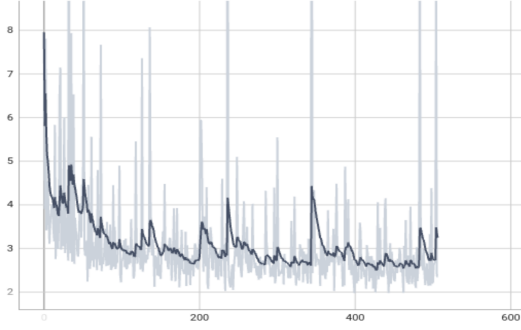

Figure 5. Loss curves for finetuning SAM2 on TotalSegmentator dataset.

frame. The model is trained on 8 80GB A100 GPU for 500 epochs until full convergence as shown in Fig. 5. However, the results as shown in Fig. 4 is disappointing. We also finetuned on MSD Task07 pancreas and pancreas tumor to reduce the class number. The results can be shown in Table. 2. The SAM2 method can track objects with simple shape and clear boundary very well, like femur bones, but failed to track complicated 3D shapes. Similar findings can be found in [6].

---

#### Algorithm 2 Automatic branch training

---

**Require:** VISTA automatic branch model  $\Phi_a$  with encoder frozen, image patch  $x$ , image manual label  $y$ , image pseudo label  $y_p$ .

**Ensure:** At least one of  $y$  or  $y_p$  are not None

$c, y_{gt} \leftarrow y.unique().sample()$  ▷ Sample class prompts  $c$  and segmentation mask  $y_{gt}$

$c^p, y_{gt}^p \leftarrow y_p.unique().sample()$

$loss \leftarrow LossFunction(\Phi_a(x, c), y_{gt})$

$loss_p \leftarrow LossFunction(\Phi_a(x, c^p), y_{gt}^p)$

update  $\Phi_a$  using  $loss + loss_p$

---

## 4. Additional Results

We provide additional VISTA3D results in this section. The baseline MedSAM [10] and SegVol [3] results are from their provided user interface and online hugging-face demo.

### 4.1. Qualitative Results

**Editing examples** We show an extreme example in Fig. 6, illustrating that VISTA3D supports detailed editing at pixel

level, while the bounding box prompt cannot perform any editing.

**Hard Examples** We show some hard classes like hepatic vessel and pancreas in Fig. 7 and Fig. 8. Those classes are included in VISTA3D’s and SegVol’s training sets. We randomly picked an abdominal scan from the MSD task09 spleen test split. This dataset does not contain annotations for pancreas or hepatic vessel, thus it can avoid groundtruth leakage and provide fair comparison.

**Zero-shot interactive examples** In Fig. 9, we show the interactive segmentation on a micro-CT mouse left lung. We can see that MedSAM has a major weakness of not being able to perform fine detailed editing, while SegVol’s response resolution is low. Fig. 10 shows other slices of the same mouse scan as Fig. 9. The figure shows a good point response on slices even far away from the clicks, illustrating the ability of 3D annotation and reducing annotation effort. We also provide additional illustrations of Mouse-CT dataset and our zero-shot results for left lung in Fig. 11.

**Overfitting to common organs** Due to the lack of diversity of 3D organs, the model can easily overfit to certain classes and remember the shapes, intensities, or locations. This is beneficial for achieving superior segmentation accuracy, but on the other hand, the model will ignore point clicks, even without providing any semantic information about the class. An example is shown in Fig. 12. We click a point outside of the kidney to segment the fluid around, and this should be zeroshot. SegVol directly segments the kidney and ignores the point. VISTA3D avoids this problem by using the zero-shot embedding and the novel model and recipe design. The area outside of organ is relatively easy; what if we want to forcefully segment a supported organ into sub-parts? We show an example in Fig. 13. If we click positive points on the liver, the model tends to ignore the points and directly segment the liver. Adding a zero-shot embedding will make the model follow the clicks much better.

## 4.2. Quantitative Results

We provide detailed Dice scores on all the classes of our test datasets. The result is shown in Table. 3.

## 5. Additional Discussions

The VISTA3D model design will naturally raise two questions, why not share decoder and why share encoder. If we share the encoder and decoder, then automatic and interactive will be trained together, which will 1) slow down the training. Interactive branch is much more memory intensive than automatic branch, and the supervoxels are only used for interactive training, thus, automatic branch can use a much larger batch size. Combine these two training will reduce automatic branch training iteration and its performance. 2) There are internal conflicts between zero-shot and automatic segmentation, our pilot study showed worse

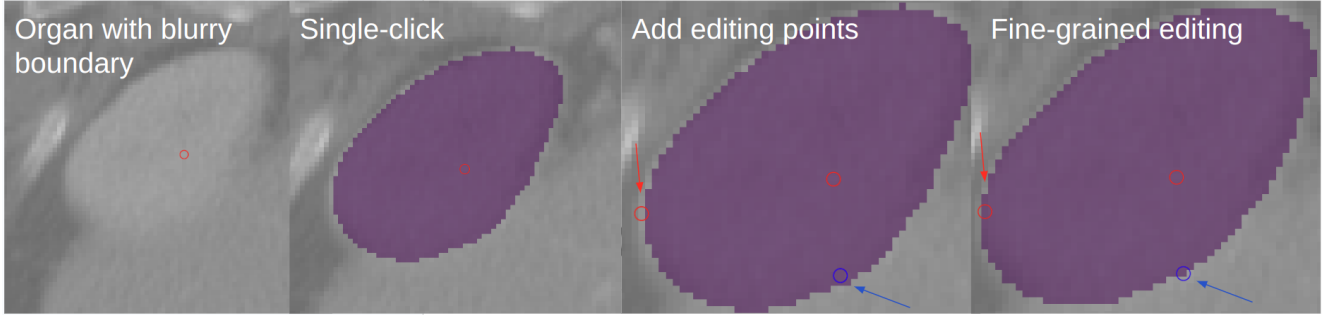

Figure 6. Fine-grained editing on blurry boundary. Red is positive point and blue is the negative point. This is an extreme example to show that VISTA3D can edit one-pixel wide boundaries. The addition or removal area depends on the model’s understanding of boundaries, and the edited area by a single click could be much larger.

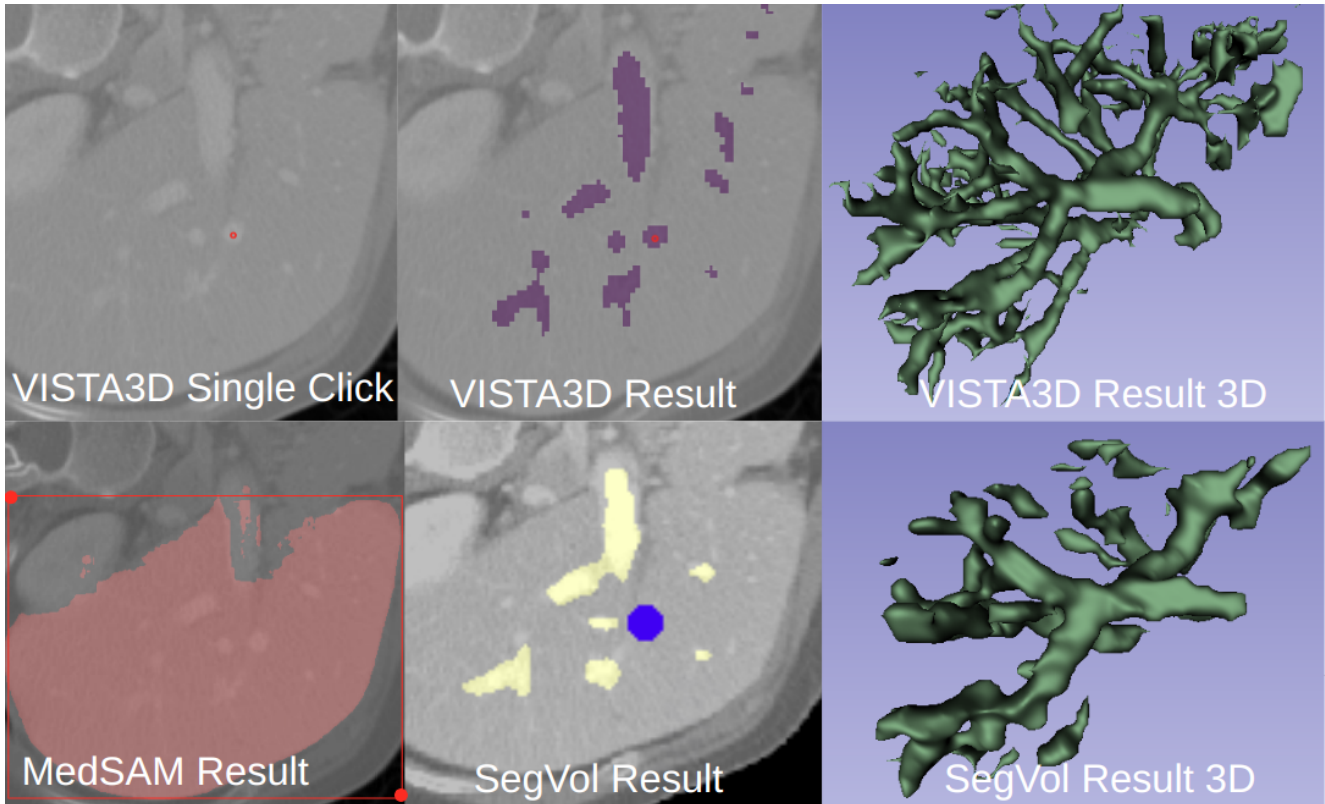

Figure 7. Single positive point for hepatic vessel segmentation (example from MSD09 spleen held out test set, no hepatic vessel groundtruth to avoid groundtruth leakage). SegVol demo uses blue dot while VISTA3D demo uses red dot to represent positive clicks. VISTA3D achieved much better results in details.

results and our auto-branch is not able to reach state-of-the-art results once trained together with interactive branch. Sharing encoder has two purposes, 1) we support interactive editing over automatic results, the shared encoder could reduce inference computation cost. 2) The interactive branch can be trained with a much broader range of data, thus the encoder can extract more generalizable features and help with the generalizability of automatic segmentation.



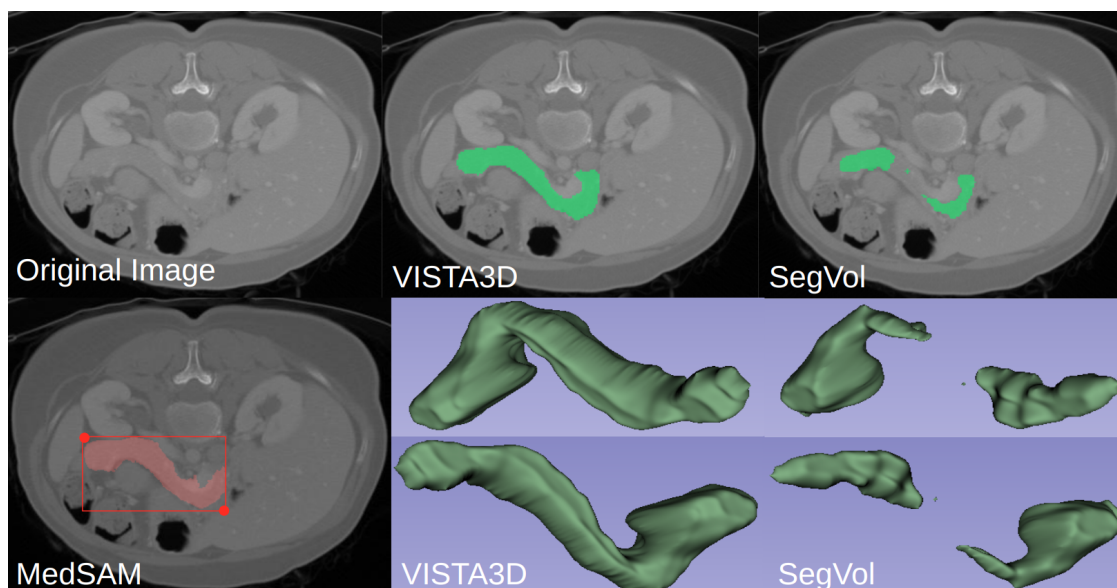

Figure 8. Automatic (semantic) segmentation for pancreas (example from MSD09 spleen held out test set, no pancreas groundtruth). VISTA3D achieves much better results in details and segmentation completeness.

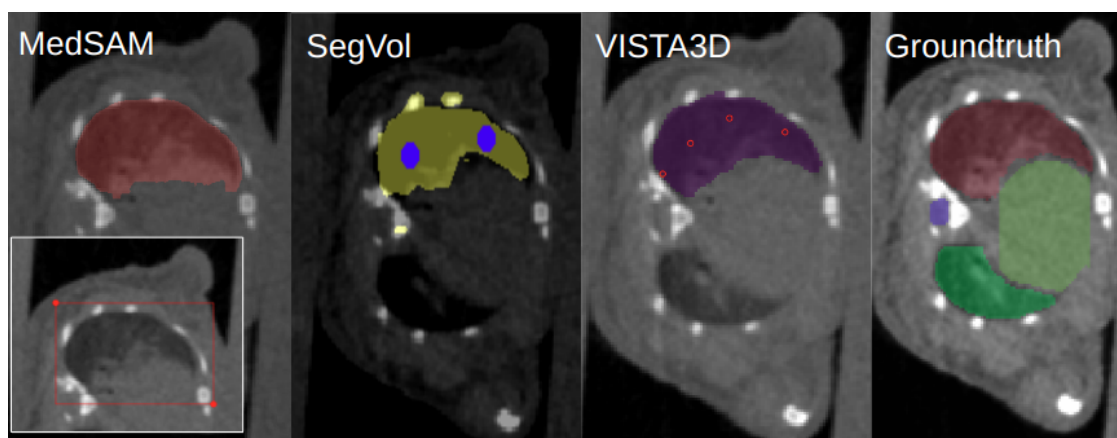

Figure 9. Interactive segmentation on micro-CT mouse left lung. Baseline results from MedSAM local user interface and SegVol demo.

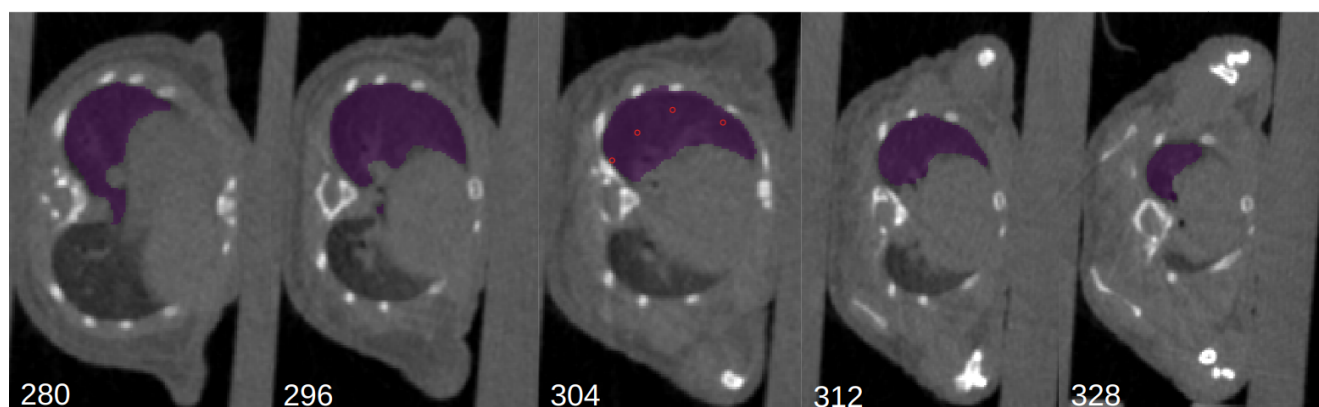

Figure 10. 3D point response on far away slices. The point click is on slice 304 (same as Fig. 9), but the segmentation on slices 280, 296, 312, and 328 all showed good results, showing the potential of reducing annotation effort in 3D space.

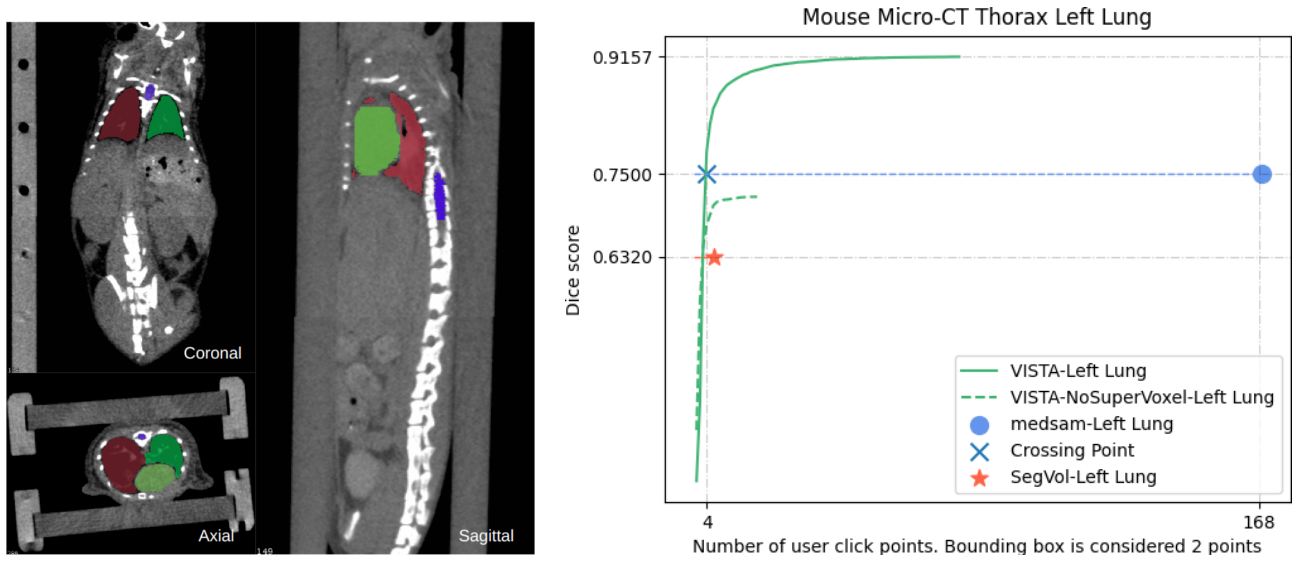

Figure 11. The mouse micro-CT example and the mouse left lung zero-shot performances. Even "left lung" is in the supported class, the huge structural difference between human and mice will fail any automatic segmentation model trained on human anatomy.

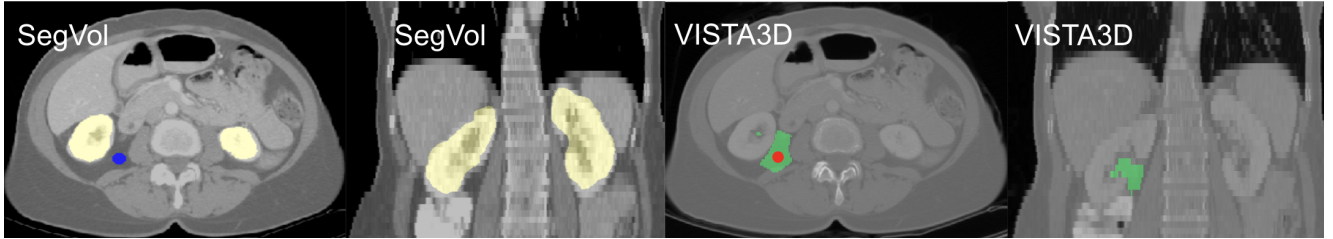

Figure 12. The overfitting problem with common organs. Due to the lack of diversity of 3D organs, the model can easily overfit to certain classes and ignore point clicks, even without providing any semantic information about the class. We click a positive point outside of kidney to segment the fluid around, and this should be zeroshot. SegVol directly overfits to segment kidney and ignores the points. VISTA3D avoided this problem by using the zero-shot embedding and the novel model and recipe design.

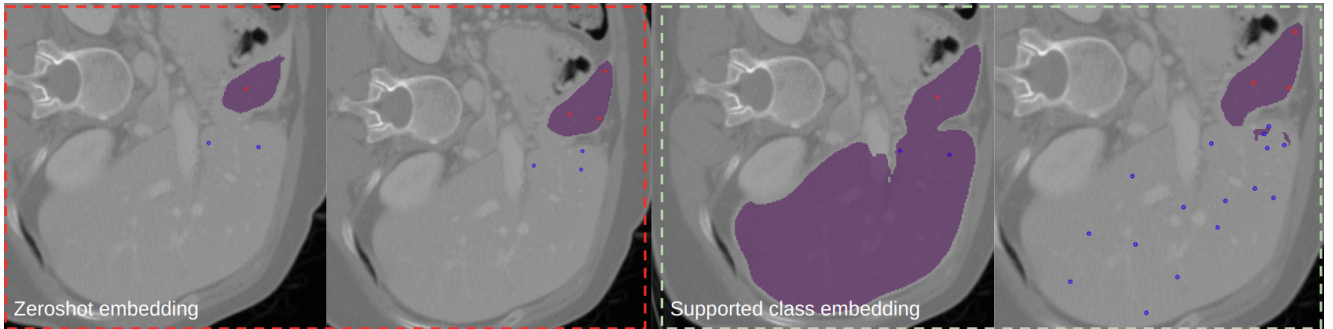

Figure 13. Use points to forcefully separate liver into substructures. We can see that VISTA3D with zero-shot embedding responds much better to the clicks. However, if the model uses supported class embedding, the model is reluctant to respond to negative points for liver segmentation.

Table 3. Dice score of all the classes on the test datasets.

|                               | Auto-3dSeg | nnUNet | TotalSeg-mentator | VISTA3D auto | VISTA3D point | VISTA3D auto + point |
|-------------------------------|------------|--------|-------------------|--------------|---------------|----------------------|
| <b>MSD03 Hepatic Tumor</b>    |            |        |                   |              |               |                      |
| liver                         | 0.943      | 0.947  | 0.942             | 0.959        | 0.874         | 0.961                |
| hepatic tumor                 | 0.616      | 0.617  | -                 | 0.588        | 0.701         | 0.687                |
| <b>MSD06 Lung Tumor</b>       |            |        |                   |              |               |                      |
| lung tumor                    | 0.562      | 0.554  | -                 | 0.614        | 0.682         | 0.719                |
| <b>MSD07 Pancreatic Tumor</b> |            |        |                   |              |               |                      |
| pancreas                      | 0.785      | 0.789  | 0.775             | 0.819        | 0.802         | 0.840                |
| pancreatic tumor              | 0.485      | 0.488  | -                 | 0.324        | 0.603         | 0.638                |
| <b>MSD08 Hepatic Tumor</b>    |            |        |                   |              |               |                      |
| hepatic vessel                | 0.627      | 0.584  | -                 | 0.553        | 0.582         | 0.670                |
| hepatic tumor                 | 0.683      | 0.659  | -                 | 0.682        | 0.733         | 0.757                |
| <b>MSD09 Spleen</b>           |            |        |                   |              |               |                      |
| spleen                        | 0.965      | 0.967  | 0.935             | 0.952        | 0.938         | 0.954                |
| <b>MSD10 Colon Tumor</b>      |            |        |                   |              |               |                      |
| colon cancer primaries        | 0.475      | 0.473  | -                 | 0.439        | 0.609         | 0.633                |
| <b>AeroPath</b>               |            |        |                   |              |               |                      |
| lung                          | 0.982      | 0.974  | 0.957             | -            | -             | -                    |
| airway                        | 0.896      | 0.899  | -                 | 0.852        | 0.819         | 0.867                |
| <b>Bone Lesions</b>           |            |        |                   |              |               |                      |
| bone lesions                  | 0.343      | 0.396  | -                 | 0.491        | 0.536         | 0.585                |
| <b>BTCV-Abdomen</b>           |            |        |                   |              |               |                      |
| spleen                        | 0.954      | 0.962  | 0.951             | 0.944        | 0.950         | 0.955                |
| right kidney                  | 0.936      | 0.951  | 0.941             | 0.943        | 0.937         | 0.945                |
| left kidney                   | 0.942      | 0.932  | 0.944             | 0.942        | 0.938         | 0.946                |
| gallbladder                   | 0.663      | 0.771  | 0.739             | 0.794        | 0.792         | 0.807                |
| esophagus                     | 0.740      | 0.740  | 0.793             | 0.779        | 0.799         | 0.821                |
| liver                         | 0.964      | 0.961  | 0.970             | 0.967        | 0.715         | 0.969                |
| stomach                       | 0.876      | 0.797  | 0.946             | 0.944        | 0.938         | 0.946                |
| aorta                         | 0.929      | 0.909  | 0.929             | 0.931        | 0.925         | 0.932                |
| inferior vena cava            | 0.834      | 0.827  | 0.854             | 0.842        | 0.729         | 0.856                |
| portal vein and splenic vein  | 0.649      | 0.752  | 0.781             | 0.775        | 0.734         | 0.780                |
| pancreas                      | 0.759      | 0.820  | 0.807             | 0.841        | 0.797         | 0.853                |
| right adrenal gland           | 0.604      | 0.661  | 0.696             | 0.692        | 0.673         | 0.699                |
| left adrenal gland            | 0.638      | 0.642  | 0.643             | 0.646        | 0.666         | 0.660                |
| <b>BTCV-Cervix</b>            |            |        |                   |              |               |                      |
| bladder                       | 0.730      | 0.752  | 0.785             | 0.800        | 0.863         | 0.871                |
| prostate or uterus            | 0.714      | 0.675  | -                 | 0.587        | 0.691         | 0.714                |
| rectum                        | 0.719      | 0.688  | -                 | -            | -             | -                    |
| small bowel                   | 0.466      | 0.527  | 0.437             | 0.544        | 0.608         | 0.679                |
| <b>VerSe</b>                  |            |        |                   |              |               |                      |
| vertebrae C1                  | 0.795      | 0.862  | 0.875             | 0.859        | 0.844         | 0.863                |
| vertebrae C2                  | 0.867      | 0.852  | 0.909             | 0.881        | 0.862         | 0.890                |
| vertebrae C3                  | 0.804      | 0.844  | 0.882             | 0.828        | 0.863         | 0.869                |
| vertebrae C4                  | 0.796      | 0.874  | 0.877             | 0.857        | 0.811         | 0.868                |
| vertebrae C5                  | 0.794      | 0.855  | 0.878             | 0.851        | 0.861         | 0.864                |
| vertebrae C6                  | 0.808      | 0.816  | 0.877             | 0.865        | 0.863         | 0.874                |
| vertebrae C7                  | 0.798      | 0.822  | 0.892             | 0.857        | 0.878         | 0.887                |
| vertebrae T1                  | 0.832      | 0.800  | 0.901             | 0.847        | 0.898         | 0.897                |
| vertebrae T2                  | 0.817      | 0.840  | 0.887             | 0.862        | 0.899         | 0.905                |
| vertebrae T3                  | 0.808      | 0.837  | 0.836             | 0.848        | 0.892         | 0.894                |
| vertebrae T4                  | 0.777      | 0.775  | 0.790             | 0.844        | 0.896         | 0.903                |
| vertebrae T5                  | 0.745      | 0.794  | 0.776             | 0.827        | 0.898         | 0.908                |
| vertebrae T6                  | 0.713      | 0.782  | 0.766             | 0.818        | 0.905         | 0.913                |
| vertebrae T7                  | 0.723      | 0.887  | 0.742             | 0.822        | 0.912         | 0.919                |
| vertebrae T8                  | 0.710      | 0.847  | 0.759             | 0.791        | 0.912         | 0.920                |
| vertebrae T9                  | 0.722      | 0.826  | 0.810             | 0.804        | 0.916         | 0.925                |
| vertebrae T10                 | 0.770      | 0.852  | 0.803             | 0.786        | 0.922         | 0.928                |
| vertebrae T11                 | 0.776      | 0.837  | 0.820             | 0.822        | 0.926         | 0.932                |
| vertebrae T12                 | 0.835      | 0.798  | 0.879             | 0.870        | 0.927         | 0.931                |
| vertebrae L1                  | 0.873      | 0.871  | 0.915             | 0.864        | 0.930         | 0.936                |
| vertebrae L2                  | 0.822      | 0.800  | 0.871             | 0.811        | 0.929         | 0.932                |
| vertebrae L3                  | 0.787      | 0.876  | 0.798             | 0.752        | 0.927         | 0.928                |

|                              |       |       |       |       |       |       |
|------------------------------|-------|-------|-------|-------|-------|-------|
| vertebrae L4                 | 0.755 | 0.773 | 0.722 | 0.707 | 0.930 | 0.932 |
| vertebrae L5                 | 0.740 | 0.763 | 0.716 | 0.735 | 0.913 | 0.919 |
| vertebrae L6                 | 0.434 | 0.475 | -     | -     | -     | -     |
| <b>AbdomenCT-1K</b>          |       |       |       |       |       |       |
| liver                        | 0.978 | 0.982 | 0.969 | 0.974 | 0.896 | 0.976 |
| kidney                       | 0.947 | 0.944 | 0.912 | -     | -     | -     |
| spleen                       | 0.967 | 0.976 | 0.968 | 0.966 | 0.959 | 0.964 |
| pancreas                     | 0.857 | 0.860 | 0.828 | 0.865 | 0.853 | 0.881 |
| <b>AMOS22</b>                |       |       |       |       |       |       |
| spleen                       | 0.953 | 0.946 | 0.930 | 0.934 | 0.933 | 0.946 |
| right kidney                 | 0.955 | 0.943 | 0.940 | 0.945 | 0.937 | 0.949 |
| left kidney                  | 0.944 | 0.950 | 0.925 | 0.931 | 0.938 | 0.948 |
| gallbladder                  | 0.779 | 0.832 | 0.813 | 0.847 | 0.814 | 0.855 |
| esophagus                    | 0.805 | 0.808 | 0.777 | 0.776 | 0.783 | 0.805 |
| liver                        | 0.971 | 0.972 | 0.958 | 0.959 | 0.901 | 0.960 |
| stomach                      | 0.858 | 0.855 | 0.882 | 0.876 | 0.863 | 0.889 |
| aorta                        | 0.944 | 0.953 | 0.914 | 0.917 | 0.897 | 0.921 |
| inferior vena cava           | 0.889 | 0.870 | 0.809 | 0.855 | 0.669 | 0.865 |
| pancreas                     | 0.809 | 0.840 | 0.773 | 0.797 | 0.757 | 0.828 |
| right adrenal gland          | 0.744 | 0.708 | 0.683 | 0.700 | 0.657 | 0.721 |
| left adrenal gland           | 0.740 | 0.714 | 0.684 | 0.704 | 0.687 | 0.724 |
| duodenum                     | 0.743 | 0.754 | 0.639 | 0.704 | 0.337 | 0.729 |
| bladder                      | 0.824 | 0.808 | 0.809 | 0.826 | 0.819 | 0.847 |
| prostate or uterus           | 0.817 | 0.827 | -     | 0.788 | 0.790 | 0.828 |
| <b>TotalSegmentatorV2</b>    |       |       |       |       |       |       |
| spleen                       | 0.957 | 0.969 | 0.982 | 0.967 | 0.965 | 0.971 |
| right kidney                 | 0.949 | 0.940 | 0.962 | 0.934 | 0.930 | 0.948 |
| left kidney                  | 0.942 | 0.922 | 0.961 | 0.920 | 0.921 | 0.941 |
| gallbladder                  | 0.807 | 0.843 | 0.896 | 0.827 | 0.782 | 0.833 |
| liver                        | 0.964 | 0.965 | 0.982 | 0.968 | 0.944 | 0.974 |
| stomach                      | 0.929 | 0.935 | 0.960 | 0.931 | 0.917 | 0.939 |
| aorta                        | 0.954 | 0.961 | 0.961 | 0.959 | 0.949 | 0.965 |
| inferior vena cava           | 0.892 | 0.902 | 0.896 | 0.883 | 0.695 | 0.896 |
| portal vein and splenic vein | 0.757 | 0.830 | 0.835 | 0.801 | 0.744 | 0.818 |
| pancreas                     | 0.845 | 0.856 | 0.917 | 0.860 | 0.833 | 0.877 |
| right adrenal gland          | 0.805 | 0.877 | 0.909 | 0.863 | 0.834 | 0.869 |
| left adrenal gland           | 0.808 | 0.866 | 0.914 | 0.873 | 0.851 | 0.881 |
| left lung upper lobe         | 0.943 | 0.939 | 0.979 | 0.953 | 0.931 | 0.955 |
| left lung lower lobe         | 0.928 | 0.953 | 0.964 | 0.938 | 0.899 | 0.944 |
| right lung upper lobe        | 0.896 | 0.912 | 0.919 | 0.878 | 0.872 | 0.905 |
| right lung middle lobe       | 0.905 | 0.939 | 0.952 | 0.916 | 0.909 | 0.930 |
| right lung lower lobe        | 0.928 | 0.950 | 0.974 | 0.943 | 0.893 | 0.951 |
| vertebrae L5                 | 0.909 | 0.930 | 0.946 | 0.916 | 0.916 | 0.933 |
| vertebrae L4                 | 0.899 | 0.929 | 0.947 | 0.899 | 0.917 | 0.933 |
| vertebrae L3                 | 0.892 | 0.927 | 0.967 | 0.925 | 0.934 | 0.957 |
| vertebrae L2                 | 0.925 | 0.928 | 0.975 | 0.936 | 0.950 | 0.968 |
| vertebrae L1                 | 0.904 | 0.917 | 0.967 | 0.919 | 0.934 | 0.955 |
| vertebrae T12                | 0.902 | 0.912 | 0.961 | 0.902 | 0.930 | 0.948 |
| vertebrae T11                | 0.899 | 0.922 | 0.970 | 0.900 | 0.930 | 0.952 |
| vertebrae T10                | 0.900 | 0.918 | 0.972 | 0.901 | 0.937 | 0.955 |
| vertebrae T9                 | 0.886 | 0.918 | 0.976 | 0.901 | 0.936 | 0.960 |
| vertebrae T8                 | 0.882 | 0.893 | 0.967 | 0.872 | 0.913 | 0.949 |
| vertebrae T7                 | 0.822 | 0.886 | 0.920 | 0.831 | 0.890 | 0.920 |
| vertebrae T6                 | 0.840 | 0.902 | 0.943 | 0.878 | 0.910 | 0.933 |
| vertebrae T5                 | 0.869 | 0.923 | 0.944 | 0.891 | 0.904 | 0.930 |
| vertebrae T4                 | 0.876 | 0.910 | 0.948 | 0.887 | 0.910 | 0.935 |
| vertebrae T3                 | 0.888 | 0.926 | 0.950 | 0.895 | 0.903 | 0.935 |
| vertebrae T2                 | 0.909 | 0.918 | 0.967 | 0.920 | 0.922 | 0.949 |
| vertebrae T1                 | 0.907 | 0.945 | 0.969 | 0.933 | 0.926 | 0.950 |
| vertebrae C7                 | 0.894 | 0.943 | 0.964 | 0.923 | 0.901 | 0.937 |
| vertebrae C6                 | 0.839 | 0.840 | 0.941 | 0.882 | 0.864 | 0.917 |
| vertebrae C5                 | 0.797 | 0.852 | 0.915 | 0.825 | 0.852 | 0.862 |
| vertebrae C4                 | 0.860 | 0.859 | 0.944 | 0.904 | 0.881 | 0.917 |
| vertebrae C3                 | 0.857 | 0.936 | 0.956 | 0.905 | 0.905 | 0.926 |
| vertebrae C2                 | 0.908 | 0.953 | 0.972 | 0.910 | 0.872 | 0.933 |
| vertebrae C1                 | 0.884 | 0.862 | 0.935 | 0.894 | 0.848 | 0.896 |
| esophagus                    | 0.874 | 0.913 | 0.952 | 0.907 | 0.886 | 0.916 |



|                             |       |       |       |       |       |       |
|-----------------------------|-------|-------|-------|-------|-------|-------|
| trachea                     | 0.926 | 0.945 | 0.974 | 0.941 | 0.910 | 0.946 |
| brain                       | 0.870 | 0.946 | 0.943 | 0.894 | 0.892 | 0.903 |
| left iliac artery           | 0.822 | 0.896 | 0.916 | 0.895 | 0.872 | 0.906 |
| right iliac artery          | 0.820 | 0.879 | 0.915 | 0.875 | 0.877 | 0.899 |
| left iliac vena             | 0.841 | 0.898 | 0.941 | 0.917 | 0.899 | 0.925 |
| right iliac vena            | 0.834 | 0.884 | 0.919 | 0.890 | 0.846 | 0.908 |
| small bowel                 | 0.854 | 0.868 | 0.918 | 0.834 | 0.840 | 0.865 |
| duodenum                    | 0.779 | 0.805 | 0.900 | 0.822 | 0.596 | 0.848 |
| colon                       | 0.882 | 0.882 | 0.948 | 0.898 | 0.819 | 0.906 |
| left rib 1                  | 0.914 | 0.938 | 0.948 | 0.909 | 0.875 | 0.918 |
| left rib 2                  | 0.934 | 0.927 | 0.966 | 0.932 | 0.909 | 0.943 |
| left rib 3                  | 0.906 | 0.929 | 0.950 | 0.910 | 0.885 | 0.907 |
| left rib 4                  | 0.908 | 0.936 | 0.947 | 0.903 | 0.887 | 0.927 |
| left rib 5                  | 0.878 | 0.895 | 0.933 | 0.889 | 0.889 | 0.928 |
| left rib 6                  | 0.865 | 0.912 | 0.925 | 0.866 | 0.884 | 0.916 |
| left rib 7                  | 0.885 | 0.907 | 0.942 | 0.877 | 0.901 | 0.934 |
| left rib 8                  | 0.902 | 0.888 | 0.955 | 0.890 | 0.910 | 0.941 |
| left rib 9                  | 0.910 | 0.901 | 0.953 | 0.897 | 0.916 | 0.944 |
| left rib 10                 | 0.911 | 0.883 | 0.949 | 0.893 | 0.906 | 0.937 |
| left rib 11                 | 0.891 | 0.894 | 0.949 | 0.903 | 0.911 | 0.938 |
| left rib 12                 | 0.885 | 0.873 | 0.912 | 0.883 | 0.871 | 0.909 |
| right rib 1                 | 0.905 | 0.938 | 0.945 | 0.907 | 0.875 | 0.912 |
| right rib 2                 | 0.933 | 0.946 | 0.959 | 0.924 | 0.888 | 0.929 |
| right rib 3                 | 0.906 | 0.938 | 0.931 | 0.891 | 0.854 | 0.900 |
| right rib 4                 | 0.928 | 0.942 | 0.949 | 0.906 | 0.882 | 0.926 |
| right rib 5                 | 0.905 | 0.893 | 0.916 | 0.876 | 0.877 | 0.914 |
| right rib 6                 | 0.900 | 0.929 | 0.951 | 0.886 | 0.907 | 0.932 |
| right rib 7                 | 0.903 | 0.914 | 0.960 | 0.884 | 0.915 | 0.942 |
| right rib 8                 | 0.888 | 0.928 | 0.959 | 0.887 | 0.913 | 0.941 |
| right rib 9                 | 0.892 | 0.928 | 0.950 | 0.890 | 0.920 | 0.946 |
| right rib 10                | 0.900 | 0.927 | 0.949 | 0.896 | 0.916 | 0.945 |
| right rib 11                | 0.880 | 0.924 | 0.933 | 0.885 | 0.891 | 0.924 |
| right rib 12                | 0.885 | 0.906 | 0.917 | 0.883 | 0.880 | 0.907 |
| left humerus                | 0.911 | 0.867 | 0.930 | 0.854 | 0.881 | 0.903 |
| right humerus               | 0.916 | 0.794 | 0.940 | 0.873 | 0.884 | 0.913 |
| left scapula                | 0.910 | 0.949 | 0.959 | 0.911 | 0.887 | 0.921 |
| right scapula               | 0.916 | 0.923 | 0.959 | 0.922 | 0.887 | 0.920 |
| left clavicle               | 0.955 | 0.917 | 0.975 | 0.952 | 0.931 | 0.956 |
| right clavicle              | 0.937 | 0.940 | 0.973 | 0.945 | 0.933 | 0.952 |
| left femur                  | 0.944 | 0.882 | 0.970 | 0.940 | 0.944 | 0.954 |
| right femur                 | 0.944 | 0.911 | 0.980 | 0.945 | 0.957 | 0.959 |
| left hip                    | 0.944 | 0.937 | 0.975 | 0.947 | 0.938 | 0.955 |
| right hip                   | 0.939 | 0.932 | 0.986 | 0.950 | 0.961 | 0.959 |
| sacrum                      | 0.925 | 0.933 | 0.958 | 0.915 | 0.895 | 0.922 |
| left gluteus maximus        | 0.925 | 0.927 | 0.977 | 0.940 | 0.938 | 0.949 |
| right gluteus maximus       | 0.917 | 0.930 | 0.978 | 0.937 | 0.937 | 0.949 |
| left gluteus medius         | 0.919 | 0.926 | 0.973 | 0.931 | 0.923 | 0.923 |
| right gluteus medius        | 0.908 | 0.927 | 0.978 | 0.938 | 0.937 | 0.946 |
| left gluteus minimus        | 0.875 | 0.917 | 0.965 | 0.914 | 0.903 | 0.919 |
| right gluteus minimus       | 0.876 | 0.920 | 0.967 | 0.915 | 0.896 | 0.921 |
| left autochthon             | 0.939 | 0.934 | 0.978 | 0.951 | 0.932 | 0.953 |
| right autochthon            | 0.941 | 0.932 | 0.976 | 0.941 | 0.927 | 0.947 |
| left iliopsoas              | 0.876 | 0.910 | 0.965 | 0.921 | 0.898 | 0.926 |
| right iliopsoas             | 0.876 | 0.916 | 0.952 | 0.907 | 0.898 | 0.914 |
| bladder                     | 0.890 | 0.906 | 0.934 | 0.899 | 0.895 | 0.915 |
| left atrial appendage       | 0.863 | 0.900 | 0.942 | 0.901 | 0.873 | 0.910 |
| brachiocephalic trunk       | 0.872 | 0.899 | 0.936 | 0.892 | 0.888 | 0.915 |
| left brachiocephalic vein   | 0.881 | 0.919 | 0.945 | 0.903 | 0.885 | 0.898 |
| right brachiocephalic vein  | 0.862 | 0.909 | 0.922 | 0.884 | 0.869 | 0.901 |
| left common carotid artery  | 0.826 | 0.884 | 0.925 | 0.868 | 0.828 | 0.891 |
| right common carotid artery | 0.755 | 0.858 | 0.885 | 0.811 | 0.784 | 0.844 |
| costal cartilages           | 0.844 | 0.868 | 0.888 | 0.856 | 0.833 | 0.864 |
| heart                       | 0.932 | 0.928 | 0.937 | 0.919 | 0.916 | 0.924 |
| left kidney cyst            | 0.623 | 0.858 | 0.892 | 0.618 | 0.752 | 0.858 |
| right kidney cyst           | 0.568 | 0.841 | 0.716 | 0.606 | 0.615 | 0.681 |
| prostate                    | 0.743 | 0.752 | 0.808 | 0.744 | 0.745 | 0.774 |
| pulmonary vein              | 0.838 | 0.820 | 0.916 | 0.830 | 0.847 | 0.863 |

|                         |       |       |       |       |       |       |
|-------------------------|-------|-------|-------|-------|-------|-------|
| skull                   | 0.909 | 0.849 | 0.893 | 0.827 | 0.769 | 0.857 |
| spinal cord             | 0.911 | 0.950 | 0.959 | 0.934 | 0.905 | 0.937 |
| sternum                 | 0.896 | 0.906 | 0.897 | 0.899 | 0.884 | 0.911 |
| left subclavian artery  | 0.833 | 0.901 | 0.929 | 0.877 | 0.857 | 0.892 |
| right subclavian artery | 0.818 | 0.870 | 0.916 | 0.861 | 0.850 | 0.885 |
| superior vena cava      | 0.894 | 0.899 | 0.932 | 0.888 | 0.905 | 0.923 |
| thyroid gland           | 0.832 | 0.886 | 0.908 | 0.866 | 0.853 | 0.890 |
| vertebrae S1            | 0.870 | 0.906 | 0.925 | 0.890 | 0.880 | 0.909 |

---

## References

- [1] Michela Antonelli, Annika Reinke, Spyridon Bakas, Keyvan Farahani, Annette Kopp-Schneider, Bennett A Landman, Geert Litjens, Bjoern Menze, Olaf Ronneberger, Ronald M Summers, et al. The medical segmentation decathlon. *Nature communications*, 13(1):4128, 2022. 1
- [2] SG Armato III, G McLennan, L Bidaut, MF McNitt-Gray, CR Meyer, AP Reeves, B Zhao, DR Aberle, CI Henschke, EA Hoffman, et al. Data from LIDC-IDRI [data set]. The Cancer Imaging Archive, 2015. 1
- [3] Yuxin Du, Fan Bai, Tiejun Huang, and Bo Zhao. Segvol: Universal and interactive volumetric medical image segmentation. *arXiv preprint arXiv:2311.13385*, 2023. 3
- [4] Wasserthal et al. TotalSegmentator: Robust segmentation of 104 anatomic structures in CT images. *Radiology: Artificial Intelligence*, 5(5):e230024, 2023. 1, 2
- [5] Stephanie A Harmon, Thomas H Sanford, Sheng Xu, Evrim B Turkbey, Holger Roth, Ziyue Xu, Dong Yang, Andriy Myronenko, Victoria Anderson, Amel Amalou, et al. Artificial intelligence for the detection of covid-19 pneumonia on chest ct using multinational datasets. *Nature communications*, 11(1):4080, 2020. 1
- [6] Yufan He, Pengfei Guo, Yucheng Tang, Andriy Myronenko, Vishwesh Nath, Ziyue Xu, Dong Yang, Can Zhao, Daguang Xu, and Wenqi Li. A short review and evaluation of sam2’s performance in 3d ct image segmentation. *arXiv preprint arXiv:2408.11210*, 2024. 3
- [7] Yuanfeng Ji, Haotian Bai, Jie Yang, Chongjian Ge, Ye Zhu, Ruimao Zhang, Zhen Li, Lingyan Zhang, Wanling Ma, Xiang Wan, et al. AMOS: A large-scale abdominal multi-organ benchmark for versatile medical image segmentation. *arXiv preprint arXiv:2206.08023*, 2022. 1
- [8] C Daniel Johnson, Mei-Hsiu Chen, Alicia Y Toledano, Jay P Heiken, Abraham Dachman, Mark D Kuo, Christine O Menias, Betina Siewert, Jugesh I Cheema, Richard G Obregon, et al. Accuracy of CT colonography for detection of large adenomas and cancers. *New England Journal of Medicine*, 359(12):1207–1217, 2008. 1
- [9] Jun Ma, Yao Zhang, Song Gu, Cheng Zhu, Cheng Ge, Yichi Zhang, Xingle An, Congcong Wang, Qiyuan Wang, Xin Liu, et al. Abdomenct-1k: Is abdominal organ segmentation a solved problem? *IEEE Transactions on Pattern Analysis and Machine Intelligence*, 44(10):6695–6714, 2021. 1
- [10] Jun Ma, Yuting He, Feifei Li, Lin Han, Chenyu You, and Bo Wang. Segment anything in medical images. *Nature Communications*, 15:1–9, 2024. 3
- [11] Blaine Rister, Darvin Yi, Kaushik Shivakumar, Tomomi Nobashi, and Daniel L Rubin. CT-ORG, a new dataset for multiple organ segmentation in computed tomography. *Scientific Data*, 7(1):381, 2020. 1
- [12] H Roth, A Farag, EB Turkbey, L Lu, J Liu, and RM Summers. Data from pancreas-CT (version 2)[data set]. The Cancer Imaging Archive (2016), 2016. 1
- [13] Joel Saltz, Mary Saltz, Prateek Prasanna, Richard Moffitt, Janos Hajagos, Erich Bremer, Joseph Balsamo, and Tahsin Kurc. Stony Brook university COVID-19 positive cases. *the cancer imaging archive*, 4, 2021. 1
- [14] Anjany Sekuboyina, Malek E Hussein, Amirhossein Bayat, Maximilian Löffler, Hans Liebl, Hongwei Li, Giles Tetteh, Jan Kukačka, Christian Payer, Darko Štern, et al. Verse: A vertebrae labelling and segmentation benchmark for multi-detector CT images. *Medical image analysis*, 73:102166, 2021. 1
- [15] Amber L Simpson, Jacob Peoples, John M Creasy, Gabor Fichtinger, Natalie Gangai, Krishna N Keshavamurthy, Andras Lasso, Jinru Shia, Michael I D’Angelica, and Richard KG Do. Preoperative CT and survival data for patients undergoing resection of colorectal liver metastases. *Scientific Data*, 11(1):172, 2024. 1
- [16] Karen-Helene Støverud, David Bouget, Andre Pedersen, Håkon Olav Leira, Thomas Langø, and Erlend Fager-tun Hofstad. AeroPath: An airway segmentation benchmark dataset with challenging pathology. *arXiv preprint arXiv:2311.01138*, 2023. 1
- [17] National Lung Screening Trial Research Team. Reduced lung-cancer mortality with low-dose computed tomographic screening. *New England Journal of Medicine*, 365(5):395–409, 2011. 1
